## Correction: A Map of Recent Positive Selection in the Human Genome

Benjamin F. Voight, Sridhar Kudaravalli, Xiaoquan Wen, Jonathan K. Pritchard

DOI: 10.1371/journal.pbio.0040072

In *PLoS Biology*, volume 4, issue 3:

Because of a typesetting error, the symbol " $\sigma$ " is incorrectly displayed as "s" in the legends of Figures 1, 2, and 5.

In the Results section, the sentence "These data consist of ~800,000 polymorphic SNPs in a total of 309 unrelated individuals" should be "These data consist of ~800,000 polymorphic SNPs in a total of 209 unrelated individuals."

In the section "Widespread Signals of Recent Selection," the sentence "For example, in simulations matching aspects of the Yoruba data, only 0.1% of windows of 50 consecutive SNPs had more than 16 SNPs with  $|iHS| > 20$ " should be "For example, in simulations matching aspects of the Yoruba data, only 0.1% of windows of 50 consecutive SNPs had more than 16 SNPs with  $|iHS| > 2.0$ ."

This correction note may be found online at DOI: 10.1371/journal.pbio.0040154.

Published April 11, 2006.

Citation: Correction: A map of recent positive selection in the human genome. *PLoS Biol* 4(4): e154.
